1 **Cellular dynamics of endosperm development in *Arabidopsis thaliana***

2 **Mohammad Foteh Ali<sup>1</sup>, Ji-Min Shin<sup>1,2</sup>, Umma Fatema<sup>1</sup>, Daisuke Kurihara<sup>3</sup>, Frédéric**  
3 **Berger<sup>4</sup>, Ling Yuan<sup>1,2,5</sup>, and Tomokazu Kawashima<sup>1</sup>**

4 <sup>1</sup>Department of Plant and Soil Sciences, University of Kentucky, KY, USA

5 <sup>2</sup>Kentucky Tobacco Research and Development Center, University of Kentucky, KY, USA

6 <sup>3</sup>Institute of Transformative Bio-Molecules (ITbM), Nagoya University, Nagoya, Japan

7 <sup>4</sup>Gregor Mendel Institute, Austrian Academy of Sciences, Vienna BioCenter, Vienna, Austria.

8 <sup>5</sup>Key Laboratory of South China Agricultural Plant Molecular Analysis and Genetic Improvement  
9 & Guangdong Provincial Key Laboratory of Applied Botany, South China Botanical Garden,  
10 Chinese Academy of Sciences, Guangzhou, China

11 These authors contributed equally: Mohammad Foteh Ali, Ji-Min Shin

12 Correspondence to Tomokazu Kawashima ([tomo.k@uky.edu](mailto:tomo.k@uky.edu))

13

14 **Abstract**

15 After double fertilization, the endosperm in the seeds of many flowering plants undergoes repeated  
16 mitotic nuclear divisions without cytokinesis, resulting in a large coenocytic endosperm that then  
17 cellularizes. Growth during the coenocytic phase is strongly associated with the final seed size;  
18 however, a detailed description of the cellular dynamics controlling the unique coenocytic  
19 development in flowering plants has remained elusive. By integrating confocal microscopy live-  
20 cell imaging and genetics, we have characterized the entire development of the coenocytic  
21 endosperm of *Arabidopsis thaliana* including nuclear divisions, their timing intervals, nuclear

22 movement, and cytoskeleton dynamics. Around each nucleus, microtubules organize into aster-  
23 shaped structures that drive F-actin organization. Microtubules promote nuclear movement after  
24 division while F-actin restricts it. F-actin is also involved in controlling the size of both the  
25 coenocytic endosperm and mature seed. Characterization the of cytoskeleton dynamics in real-  
26 time throughout the entire coenocyte endosperm period provides foundational knowledge of plant  
27 coenocytic development, insights into the coordination of F-actin and microtubules in nuclear  
28 dynamics, and new opportunities to increase seed size and our food security.

29

## 30 **Introduction**

31 Flowering plants perform a unique double fertilization<sup>1,2</sup>. The pollen tube contains two sperm cells,  
32 one of which fertilizes the egg cell and the other fertilizes the central cell to generate the embryo  
33 and endosperm in the developing seed, respectively<sup>3-5</sup>. The endosperm serves as a nourishing  
34 tissue for the developing embryo during the early phase of seed development. In many monocots  
35 such as rice, wheat, and corn, the endosperm persists until maturation and stores carbohydrates  
36 and proteins, which are the primary food source for humankind<sup>5-7</sup>, whereas in dicots such as beans  
37 and *Arabidopsis thaliana*, the endosperm is consumed by the embryo during subsequent seed  
38 development<sup>4</sup>. The endosperm not only holds great agricultural importance but also has an  
39 essential role in the evolutionary success of flowering plants.

40 In *Arabidopsis*, endosperm development follows four developmental phases: coenocyte,  
41 cellularization, differentiation, and cell death<sup>3,8</sup>. The coenocyte development starts immediately  
42 after fertilization of the central cell, which undergoes several rounds of nuclear division without  
43 cytokinesis<sup>9</sup>. The endosperm enlarges and differentiates into the micropylar endosperm (MCE),

44 the chalazal endosperm (CZE), and the peripheral endosperm (PEN). After rounds of repeated  
45 mitotic nuclear divisions, the coenocytic endosperm starts to cellularize from the MCE toward  
46 PEN and it remains uncellularized in the CZE<sup>9</sup>. The timing of the transition from the coenocytic  
47 endosperm to cellularized endosperm determines the final seed size; shorter coenocytic endosperm  
48 periods or precocious endosperm cellularization results in relatively smaller seeds, whereas longer  
49 coenocytic periods or delayed endosperm cellularization are associated with enlarged seeds<sup>10-17</sup>.  
50 It remains largely unknown what cellular dynamics occur in the early phase of endosperm growth  
51 and how they control this unique coenocytic development.

52 In both plants and animals, cytoskeletal structures such as actin filaments (F-actin) and  
53 microtubules (MTs) regulate many fundamental cellular processes<sup>18-25</sup>, including those in plant  
54 reproduction such as pollen tube growth and guidance, sperm nuclear migration, and asymmetric  
55 division of the zygote<sup>18-20,26-28</sup>. Immunostaining studies of coenocytic endosperm at interphase  
56 revealed a nucleus-based radial MT (aster-shaped) system that organizes cytoplasm into nuclear-  
57 cytoplasmic domains<sup>21-24</sup>. F-actin shows reticulate patterns during the mitotic phase, but its  
58 function has not been reported<sup>21,23</sup>. The advancement of live-cell imaging using confocal  
59 microscopy has enabled us to visualize F-actin and MT dynamics with the nuclei in real time. We  
60 performed both pharmacological and genetic analyses in *Arabidopsis* to characterize the complete  
61 development of coenocytic endosperm, including the details of nuclear movements, nuclear  
62 divisions, and division timings from fertilization until endosperm cellularization. Immediately  
63 following the nuclear divisions, aster-shaped MTs around each nucleus become a foundation for  
64 F-actin aster organization and both MTs and F-actin are indispensable for nuclear organization  
65 during the coenocytic phase of endosperm development. Our results also showed that the  
66 manipulation of F-actin dynamics in the coenocytic endosperm affects the final seed size without

67 altering the timing of endosperm cellularization, revealing a new regulatory mechanism for  
68 controlling seed size.

69

## 70 **Results**

### 71 **Live-cell imaging reveals coenocytic endosperm nuclei dynamics.**

72 We performed time-lapse confocal microscopy to monitor nuclear movements and divisions  
73 during the coenocytic phase in *Arabidopsis* endosperm (*proFWA::H2B-mRuby2*<sup>18</sup>). The division  
74 of the primary endosperm nucleus was observed approximately 2-3 hours from the observation  
75 start (Fig. 1a, g and Extended Data Table 1 and Video 1), consistent with previous reports<sup>9,29,30</sup>.  
76 The first four nuclear divisions, occurring between 0 and 1 DAP (days after pollination), were  
77 synchronous and rapid with 3 to 6 hour intervals (Fig. 1a-d, g and Extended Data Table 1 and  
78 Video 1). As the micropylar-chalazal axis extended and bent at the chalazal end, nuclei moved  
79 toward both micropylar and chalazal poles and were positioned in an equidistant manner (Fig. 1b-  
80 c). After the 3<sup>rd</sup> division (8 nuclei), two nuclei at the chalazal side moved further into the chalazal  
81 pole (Fig. 1c), founding the CZE<sup>9</sup>.

82 After the 4<sup>th</sup> division (16 nuclei), the three endosperm sub-regions, the MCE, the PEN, and  
83 the CZE, followed distinct nuclear division patterns (Fig. 1d, g and Video 1). The enlargement of  
84 the PEN began and all PEN nuclei maintained active synchronous division until cellularization  
85 (Video 1). After the 5<sup>th</sup> division, 3-4 nuclei were moved to the end of the MCE, and 1-2 nuclei  
86 among these MCE nuclei ceased dividing (Fig. 1e, g and Video 1). In the CZE, the two nuclei that  
87 moved to the chalazal pole after the 3<sup>rd</sup> division divided once more, and these four became the

88 foundation of the multinucleate chalazal cyst (Fig. 1d,e, g and Video 1). The cyst enlarged during  
89 development and continuously incorporated nuclei from the PEN (Fig. 1g and Video 1).

90 Nuclear division intervals in the PEN and the MCE regions after the 4<sup>th</sup> division became  
91 successively longer (1 DAP) with the progression of divisions; the 3<sup>rd</sup>, 4<sup>th</sup>, and 5<sup>th</sup> divisions took  
92 4-5, 6-7, and 8-9 hours, respectively (Fig. 1g). From the 6<sup>th</sup> division, the endosperm nuclei division  
93 intervals were 14-18 hours until the 9<sup>th</sup> division (5 DAP), and the last division took 11-12 hours  
94 (Fig. 1g). In total, ten nuclear divisions in the PEN were observed before cellularization in our  
95 live-cell imaging system (Fig. 1g and Extended Data Table 1 and Video 1). Cellularization was  
96 initiated 1-2 hours after the 10<sup>th</sup> division (5 DAP; Fig. 1g and Video 1), starting from the MCE to  
97 PEN. The CZE remained uncellularized, consisting of chalazal nodules and cyst. Both *in planta*  
98 (Extended Data Fig. 1a) and semi-*in vivo* (Fig. 1g), the total duration of all nuclear divisions in  
99 coenocytic endosperm development was approximately 5 DAP, demonstrating that our live-cell  
100 imaging system reflects the development of young *Arabidopsis* seeds *in planta*.

101

102 **F-actin generates unique aster-shaped structures around each nucleus of the MCE and the**  
103 **PEN and controls the nuclear position.**

104 To understand how the cytoskeleton is involved in the dynamics of coenocytic endosperm nuclei,  
105 we monitored coenocytic endosperm F-actin dynamics (*proFWA::Lifeact-Venus*<sup>19</sup>; Fig. 2). There  
106 is a constant inward movement of F-actin meshwork for sperm nuclear migration in the central  
107 cell upon fertilization (Fig. 2a) and this inward movement disappears after successful fertilization<sup>19</sup>.  
108 Until after the 2<sup>nd</sup> endosperm nuclear divisions, F-actin retained a reticulate cable network  
109 throughout the cell that enmeshed each endosperm nucleus (Fig. 2b, c and Extended Data Fig. 2).

110 After the 3<sup>rd</sup> nuclear divisions, the central vacuole develops and pushes the cytoplasm including  
111 nuclei to the plasma membrane periphery (Video 2). F-actin generated unique aster-shaped  
112 structures between each nucleus and the plasma membrane, and these were connected to each other  
113 through long filaments (Fig. 2d-g, Extended Data Fig. 2 and Video 2-3). F-actin asters were visible  
114 during the remaining coenocytic endosperm development (Fig. 2d-g and Video 3) and disappeared  
115 upon cellularization (Fig. 2h).

116 Treatment with the F-actin depolymerizing drug, Latrunculin B (Lat B), caused random  
117 bouncing-like movements of nuclei, especially immediately after nuclear divisions (Video 4). In  
118 the control, daughter nuclei moved away from the position of their mother nucleus and upon  
119 reaching the maximal displacement, they maintained their positions until the next round of nuclear  
120 division (Extended Data Fig. 3 and Video 4). By contrast, in the Lat B treatment, nuclei kept  
121 moving further after nuclear division, nearly colliding with neighboring nuclei and bouncing back  
122 and forth (Fig. 2i-l and Video 4). Consistently, the endosperm-specific expression of the semi-  
123 dominant negative *ACTIN* gene generating fragmented F-actin (*proFWA::DN-ACT8*, hereafter  
124 referred to as *DN-ACTIN*<sup>19</sup>) also showed the random bouncing-like movement of nuclei after  
125 nuclear division (Fig. 3a-c, e-g and Video 5). These data indicate that F-actin does not play a major  
126 role in pulling the daughter nuclei immediately after the division, but it restricts further movement  
127 and controls their equidistant positioning in the coenocytic PEN.

128 In the CZE, Lifeact-Venus did not visualize any obvious structures in the CZE region  
129 where chalazal nodules are generated and moved to the chalazal cyst (Fig. 2e-g and Video 3).  
130 Despite the lack of characterization of F-actin in the CZE, we observed abnormal cyst formation  
131 in *DN-ACTIN* (Fig. 3h). In the control, one large cyst is present at the chalazal pole (Fig. 3d),  
132 whereas in *DN-ACTIN*, there were multiple small cysts that could not move towards the chalazal

133 pole (Fig. 3d, h, o and Extended Data Fig. 1), indicative of a role for F-actin in depositing and  
134 incorporating nuclei at the chalazal pole. Lifeact recognizes F-actin by binding to a hydrophobic  
135 pocket on two adjacent actin subunits preferentially with the closed D-loop (DNase I binding loop),  
136 a hallmark of ADP states of F-actin<sup>31,32</sup>. The hydrophobic binding site of F-actin overlaps with the  
137 binding region of actin binding proteins, such as cofilin and myosin, resulting in binding  
138 competition between Lifeact and actin binding proteins<sup>31</sup>. The class XI myosin, *XIG* (*AT2G20290*)  
139 and cofilin (*AT3G45990*) are highly enriched in CZE<sup>33,34</sup>. It still remains unclear why F-actin is  
140 not visible in the CZE while playing a role in nuclear transport. Further analyses are awaited to  
141 reveal whether distinctive conformational changes of F-actin that might have altered Lifeact  
142 binding affinity<sup>31</sup> and/or intensive competition of Lifeact with competitors such as *XIG* and cofilin  
143 exist in the CZE.

144 To further understand the role of F-actin in coenocytic endosperm development, we  
145 monitored the dynamics in an endosperm-specific *ACT8* over-expressing line (*proFWA::ACT8*,  
146 hereafter referred to as *OX-ACTIN*<sup>35</sup>; Fig. 3i-k). Over-expression of actin isoforms can change  
147 actin organization such as increasing actin bundling or density by massive polymerization likely  
148 due to the increased concentration of G-actin<sup>36,37</sup>. Compared to the control, *OX-ACTIN* showed a  
149 significantly increased number of actin bundles on each nucleus and longer internuclear distances  
150 (Fig. 3i-k, m, n). The overall structure of F-actin in the endosperm as well as the nuclear division  
151 pattern, intervals, movements, and formation of the cyst in *OX-ACTIN* were similar to those in the  
152 control (Fig. 3a-d, i-o, Extended Data Figs. 1, 4 and Video 6). These results further support the  
153 notion that it is not a delicate balance of actin dynamics, but rather the unique F-actin structures  
154 that are important in the arrangement and movement of endosperm nuclei during coenocytic  
155 endosperm development.

156

157 **MTs contribute to the foundation of F-actin organization and regulates nuclear movement.**

158 Coenocytic endosperm MT (*proFWA::TagRFP-TUA5*) asters radiated from each nucleus during  
159 mitosis (Fig. 4a-d, f and Video 7), consistent with the immunofluorescence patterns previously  
160 reported<sup>21-24</sup>. The dynamics of coenocytic endosperm MTs during mitosis and interphase was  
161 similar with that in somatic cells (Fig. 4e and Video 8)<sup>38,39</sup>. The nuclear-based MT asters became  
162 more apparent after the 3<sup>rd</sup> nuclear divisions, coinciding with F-actin aster formation (Figs. 2 and  
163 4b-d, Extended Data Fig. 2). F-actin asters radiating over the nucleus co-localized with MTs (Fig.  
164 4g-k). When MTs formed spindles during the mitotic phase, F-actin asters became disorganized  
165 concomitantly and reassembled with the formation of MT asters after nuclear division (Extended  
166 Data Fig. 5). To further investigate the relationship between F-actin and MTs, we monitored the  
167 dynamics of MTs and F-actin in the presence of Lat B and oryzalin (an inhibitor of MT  
168 polymerization)<sup>40</sup>. With 10  $\mu$ M oryzalin, the endosperm MT asters became less apparent within 3  
169 hours of the treatment, nuclear division failed, and the nuclei aggregated (Fig. 5a-d, Extended Data  
170 Fig 6, and Video 8). Treatment with 20  $\mu$ M oryzalin for 1 hour disrupted overall MTs, also  
171 resulting in failed nuclear division and seeds that then collapsed (Extended Data Fig. 6). F-actin  
172 organization was also affected by oryzalin; after most MT asters disappeared, the F-actin asters  
173 became a disorganized reticulate pattern uncentered on the nuclei (Fig. 5e-h and Extended Data  
174 Fig. 6 and Video 9). These results suggest that MT asters are required for F-actin aster formation  
175 in the coenocytic endosperm. To determine whether, and if so, when F-actin asters recover after  
176 MT aster reconstruction, we performed time-lapse F-actin imaging after the oryzalin wash-out (20  
177  $\mu$ M for 1 hour). Both MT and F-actin asters reappeared approximately 2 and 7 hours after washout,  
178 respectively, and normal mitotic nuclear divisions and movement followed (Fig. 5i-p, and Video



179 10). Lat B treatment did not affect the overall MTs organization (Extended Data Fig. 7, and Video  
180 8), consistent with the result that nuclear division controlled primarily by MT was normal in both  
181 Lat B and *DN-ACTIN* (Figs. 2k-l and 3e-g and Videos 5 and 6). Taken together, these results  
182 indicate that the MT asters generated immediately after nuclear division serve as the foundation  
183 for the aster-shaped F-actin that restricts nuclear movement and controls nuclear equidistance.

184

### 185 **F-actin dynamics in the coenocytic endosperm affect the endosperm and final seed size.**

186 The size of *DN-ACTIN* coenocytic endosperm remained smaller with shorter internuclear distances  
187 compared to the control (Figs. 3n and 6a, b). While the endosperm nuclei divisions at the beginning  
188 were not significantly altered in *DN-ACTIN*, the division intervals in later stages from the 6<sup>th</sup>  
189 division became longer than those of the control and the cellularization was delayed (Extended  
190 Data Fig. 4). In the control, 80% of the seeds reached the heart-shaped embryo stage and the  
191 endosperm started cellularizing at 5 DAP, and at 6 DAP, 85% of the embryos reached the torpedo-  
192 shaped embryo stage (Fig. 6c, d and Extended Data Fig. 1). Whereas in *DN-ACTIN*, 77% of the  
193 embryos reached the heart-shaped stage without endosperm cellularization at 5 DAP, and just 7%  
194 of the embryos reached the torpedo-shaped stage at 6 DAP (Fig. 6c, d and Extended Data Fig. 1).  
195 The timing of cellularization is known to be highly associated with the seed size<sup>8,13,14</sup>, however,  
196 *DN-ACTIN* produced smaller seeds with a longer coenocytic endosperm phase compared to the  
197 control (Fig. 6e-g).

198 In contrast to *DN-ACTIN*, we observed larger seeds in *OX-ACTIN* compared to the control  
199 (Fig. 6e-g). *OX-ACTIN* did not show any change in nuclear division numbers and intervals in the  
200 coenocytic endosperm (Extended Data Fig. 4) but caused enlarged coenocytic endosperm (Fig. 6a,

201 b). The *OX-ACTIN* coenocytic endosperm showed an increased number of actin bundles on each  
202 nucleus with longer internuclear distance compared to the control (Fig. 3i-k, m, n). The  
203 developmental speed of both embryo and coenocytic endosperm did not differ in the control and  
204 *OX-ACTIN* (Fig. 6c, d and Extended Data Fig. 4). Taken together, these results show that the  
205 coenocytic endosperm area before cellularization in these endosperm-actin-manipulated lines  
206 reflects the mature seed size and there is no positive correlation between the duration of the  
207 coenocytic endosperm development and the final seed size (Fig. 6b, f and Extended Data Fig. 4).

208

## 209 **Discussion**

210 This work has revealed the details of coenocytic endosperm dynamics that highlight the unique  
211 function of F-actin for the organization of endosperm nuclei, the requirement of MTs for F-actin  
212 aster organization, and the role of F-actin in seed size determination. The *Drosophila melanogaster*  
213 embryo has been intensively studied as a coenocyte model where both F-actin and MTs actively  
214 control coenocyte nuclear dynamics<sup>41,42</sup>. Similar to *Arabidopsis*, MTs generate the force to pull  
215 daughter nuclei apart during mitotic phase and F-actin restricts the movement and maintains the  
216 position of these daughter nuclei in the *Drosophila* coenocytic embryo<sup>41,42</sup>. However, while MTs  
217 show similar nucleus-centered aster structures at interphase in both species, *Drosophila* F-actin  
218 displays a dome-like accumulation between the plasma membrane and each nucleus at interphase  
219 in the actin-rich cortex<sup>41-45</sup>. *Arabidopsis*, on the other hand, generates F-actin asters between the  
220 plasma membrane and each nucleus (Video 2), and the difference in F-actin structure between  
221 them is possibly due to an additional function of F-actin in *Drosophila*. The dome-shaped F-actin  
222 acts as an anchoring platform to hold nuclei at the cortex<sup>41,43,45</sup>. In *Arabidopsis*, there is a large  
223 central vacuole in the coenocytic endosperm, pushing the cytoplasm to the plasma membrane

224 periphery and the endosperm nuclei do not need any active anchoring system to maintain their  
225 positions close to the plasma membrane periphery (Video 2). F-actin in *Arabidopsis* might simply  
226 be reassembled by MT, stay co-aligned with MT as asters, and play a role in restricting nuclear  
227 movement after division and controlling the distances among nuclei in PEN and MCE. In the CZE,  
228 PEN nuclei were pulled or pushed by F-actin towards the chalazal pole to generate the cyst (Video  
229 3). In *DN-ACTIN*, the deposition of nuclei in the chalazal pole was disturbed, resulting in multiple  
230 small-sized cysts in the CZE (Fig. 3h, o). These results suggest that in addition to restricting the  
231 nuclear movement in PEN, F-actin has a role in nuclei movement toward the chalazal pole. The  
232 formin *AtFH5*, one of the actin nucleators, is highly expressed in the chalazal endosperm and the  
233 mutant shows smaller cysts or absence of cyst formation<sup>46</sup>, further supporting the involvement of  
234 F-actin in CZE nuclei deposition during cyst formation.

235         After double fertilization in *Arabidopsis*, rapid proliferation of the coenocytic endosperm  
236 through mitosis without cytokinesis governs the increase in seed volume until endosperm  
237 cellularization occurs. Precocious endosperm cellularization can result in relatively smaller seeds,  
238 while delayed endosperm cellularization is associated with enlarged seeds in *Arabidopsis* and  
239 rice<sup>8,13,14</sup>. In addition, because of the potential importance of the cyst for maternal nutrient transfer  
240 to the seed<sup>47,48</sup> as well as enlargement of the cyst in the larger seeds of the Polycomb Repressive  
241 Complex 2 mutants (*PRC2*)<sup>49</sup>, the cyst has been considered to be linked with the final seed size.  
242 However, in our experiments, delayed endosperm cellularization with the small cyst was observed  
243 in *DN-ACTIN* that produced smaller seeds, and *OX-ACTIN* showed no change in either endosperm  
244 cellularization timing or cyst size, yet it produced larger seeds (Figs. 3o, 6d-f). Plants carrying  
245 double mutations in the *PRC2* pathway and *HAIKU* pathway generate smaller seeds with the  
246 enlarged cyst<sup>16</sup>, also supporting the idea that the cyst size is not linked with the final seed size. The

247 cyst enlargement in the PRC2 mutants is likely caused by the continuous incorporation of PEN  
248 nuclei due to the absence of endosperm cellularization.

249         What then, can cause the size increase in the coenocytic endosperm and the final seed in  
250 *OX-ACTIN*? We did not observe any changes in the dynamics of F-actin or nuclei between the  
251 control and *OX-ACTIN* (Fig. 3). However, *OX-ACTIN* showed more actin cables and bundles with  
252 longer internuclear distance, whereas *DN-ACTIN* exhibited shorter internuclear distances and  
253 smaller sizes of the coenocytic endosperm and final seed (Figs. 3m, n and 6b, e-g). Overexpression  
254 of *ACTIN* genes in somatic cells does not generate enlarged plants<sup>37</sup>, but in the coenocytic  
255 endosperm, the additional F-actin could allow tethering of nuclei further apart. Possibly the longer  
256 actin cables provide the force to expand the endosperm cell. Another possibility is that F-actin  
257 controls turgor pressure in the coenocytic endosperm. Together with MTs, F-actin plays a key role  
258 in determining plant cell shape, mainly by affecting all modes of cell expansion, which is tightly  
259 linked with turgor pressure<sup>50-52</sup>. Endosperm derived-turgor pressure of the seed is maximized at  
260 the coenocytic stage and later constrained by cellularization<sup>52</sup>. It is possible that F-actin contributes  
261 to the control of the endosperm turgor pressure or targeting regulators of cell wall properties,  
262 eventually contributing to the regulation of endosperm expansion before cellularization, which  
263 pre-determines the final seed size<sup>16</sup>. Insights into the role of F-actin in the size of the coenocytic  
264 endosperm as well as determination of the final seed size are elucidated in this study, providing  
265 new targets for strategies to increase seed size for our food security.

266

## 267 **Methods**

### 268 **Plant material and growth condition**

269 All plant lines: the F-actin control (*proFWA::Lifeact:Venus;proFWA::H2B:mRuby2*), *OX-ACTIN*  
270 (*proFWA::Lifeact:Venus;proFWA::H2B:mRuby2;proFWA::ACT8*), *DN-ACTIN*  
271 (*proFWA::Lifeact:Venus;proFWA::H2B:mRuby2;proFWA::DN-ACT8*), and MT  
272 (*proFWA::TagRFP-TUA5*) marker lines used in this work were all derived from the *Arabidopsis*  
273 *thaliana* Columbia-0 (Col-0) ecotype. Seeds were germinated and the seedlings were grown for  
274 two weeks under short-day conditions (8 h light, 22°C and 16 h dark, 18°C). Plants were then  
275 grown with continuous light at 22°C. The constructs *proFWA::Lifeact:Venus*,  
276 *proFWA::H2B:mRuby2*, *proFWA::ACT8*, and *proFWA::DN-ACT8* have been described  
277 previously<sup>18,19,35</sup>. The transgenic line carrying *proFWA::Lifeact:Venus* was crossed with the MT  
278 marker line, *proFWA::TagRFP-TUA5* to generate a double marker line of F-actin and MTs.

#### 279 **Plasmid construction and transformation**

280 The DNA construct used in the MT marker line was generated using Multisite Gateway  
281 Technology (Invitrogen, CA, USA). The multisite gateway binary vector pAlligatorG43 and entry  
282 clones of pENTRP4P1r-*proFWA* and pENTR221-*TagRFP-TUA5*, described previously<sup>20</sup>, were  
283 recombined into pAlligatorG43 to generate *proFWA::TagRFP-TUA5* and transformed into  
284 *Arabidopsis* Col-0 using the floral dip method<sup>53</sup>.

#### 285 **Sampling for the live-cell imaging and chemical preparation**

286 *Arabidopsis* siliques were dissected with a sharp knife and developing seeds were collected into  
287 an assay medium (2.1 g/L Nitsch basal salt mixture, 5% w/v trehalose dehydrate, 0.05% w/v MES  
288 KOH (pH 5.8), and 1X Gamborg vitamins) in a multi-well glass-bottom dish as described  
289 previously<sup>54</sup>. For each experiment, seeds from 4-5 siliques were collected into 200- $\mu$ L assay  
290 medium. For long live-cell imaging, 0.5% low-melting agarose and 0.1- $\mu$ L Plant tissue culture

291 contamination control (P6820, Phyto Technology Laboratories) were added to the 200- $\mu$ L assay  
292 medium. To observe division of the primary endosperm nucleus, pistils were pollinated 12h before  
293 sample collection. Lat B (stock, 10 mM; Sigma-Aldrich, MO, USA) and oryzalin (stock, 10 mM;  
294 Sigma-Aldrich, MO, USA) stock solutions were prepared in DMSO (dimethyl sulfoxide) and kept  
295 at  $-80^{\circ}\text{C}$ . Freshly prepared working concentrations of Lat B (5  $\mu\text{M}$ ) and oryzalin (10  $\mu\text{M}$  and 20  
296  $\mu\text{M}$ ) were prepared before each experiment in the assay buffer. To remove oryzalin, seeds were  
297 washed 3-4 times at 10 min intervals with the assay medium.

### 298 **Confocal microscopy and image processing**

299 All time-lapse confocal images were captured using a FV1200 laser scanning confocal microscope  
300 system (Olympus) equipped with 515-nm, and 559-nm lasers. A GaAsP detection filter was used  
301 to detect Lifeact:Venus (Ex 515-nm), H2B:mRuby2 (Ex 559-nm) and tagRFP:TUA5 (Ex 559-  
302 nm). All time-lapse images were acquired with a 40X dry objective lens. Time-lapse (15-30 min  
303 interval) images with z-planes (25-35  $\mu\text{m}$  total, 3-4  $\mu\text{m}$  each slice) were acquired using FV10-  
304 ASW 4.2 software. Laser 3-4%, HV 500-550, gain 1.25 and Kalman 2 options were used to capture  
305 images. All Z-projected static confocal images were captured using an FV3000 laser scanning  
306 confocal system (Olympus) equipped with 514-nm and 561-nm laser lines. Z-projected confocal  
307 images were acquired with a 30X silicon oil immersion objective lens. The confocal images with  
308 z-planes (30-40  $\mu\text{m}$  total, 0.76  $\mu\text{m}$  each slice) were acquired using FV31S-SW software. Laser 2-  
309 3%, HV 500-550, and gain 1.25 options were used to capture images. All images were processed  
310 by constrained iterative deconvolution using CellSens Dimension Desktop 3.2 (Olympus) to  
311 improve quality. Autofluorescence detected from the RFP channel (Em 560-620 nm) was removed  
312 by Imaris 9.7.2 (BitPlane) spot detection and masking options. Images obtained from the F-actin  
313 and MT double marker line were background-subtracted using Fiji (Image J) in both YFP (Em

314 500-560 nm) for F-actin and RFP (Em 560-620 nm) for the MT channels to remove background  
315 noise. The co-localization Pearson's and thresholded Manders' coefficient values of the YFP (F-  
316 actin) and RFP (MT) channels from the entire endosperm and region of interest (ROI; Fig. 4g-i)  
317 were analyzed using Imaris Coloc function and then a co-alignment channel was created. The  
318 localization of F-actin and MT and their co-alignment were shown in different pseudo-colors using  
319 Fiji. For histogram profiling of the YFP (F-actin), RFP (MT), and the co-alignment channels from  
320 the ROI, the lines of analysis points were drawn and the intensity plots along the lines from each  
321 channel were obtained using Fiji. The obtained intensities were normalized by dividing by the  
322 maximum value of each channel.

### 323 **Nuclei division interval measurement**

324 To measure nuclei division intervals, seeds were first categorized based on the nuclei number and  
325 size of the seeds we observed at the start time of time-lapse imaging. The time from the start of  
326 imaging to the initial nuclei division was not used for interval measurement. The measured division  
327 interval times from the subsequent divisions of multiple seeds were aligned based on the division  
328 stage and averaged.

### 329 **Nuclear movement measurement**

330 The coenocytic endosperm after the 5<sup>th</sup> division in the control, *OX-ACTIN* and *DN-ACTIN* were  
331 imaged by confocal microscopy and 3D images were created by Imaris 9.7.2 (BitPlane). All  
332 endosperm nuclei were outlined as spheres using Imaris spot detection and were used to calculate  
333 the internuclear distances. To determine the internuclear distances in the control and *OX-ACTIN*  
334 lines, the center nucleus of the PEN and the neighboring nuclei along with the F-actin asters were  
335 selected. The distance between each of the neighboring nuclei and the center nucleus was then

336 measured. Because both the F-actin and nuclear position were disrupted in *DN-ACTIN* (Fig. 3e-g),  
337 the distances between the nuclei in the periphery were measured, not the nuclei located close to  
338 other nuclei. The multiple distances from one seed sample were averaged. To measure nuclei  
339 displacement, Z-projected confocal images were processed in Fiji (ImageJ) using the tracking  
340 function from the Manual tracking plugin. From the onset of nuclear division until 2h, the daughter  
341 nuclei were tracked manually to record nuclear displacement.

### 342 **Number of actin bundles measurement**

343 The coenocytic endosperm after the 5<sup>th</sup> division in the control, *OX-ACTIN*, and *DN-ACTIN* were  
344 imaged by confocal microscopy and 3D structures were created by Imaris 9.7.2 (BitPlane). In each  
345 3D image, 5-7 PEN nuclei were selected to count the F-actin bundles manually. The total number  
346 of bundles from 5-7 selected nuclei was then averaged. For each line, the mean and standard error  
347 of the averages from 10 to 12 images were shown.

### 348 **Orientation analysis**

349 To analyze the distribution of F-actin and MT aster structures surrounding the endosperm nucleus,  
350 a square ROI where the nucleus is center was set in each image and the frequency histogram of  
351 spatial orientations of F-actin and MT was calculated using the OrientationJ Distribution plugin  
352 (<http://bigwww.epfl.ch/demo/orientation/>) of Fiji. To evaluate aster structures, the cables above  
353 the nucleus were excluded from the calculation by masking the nucleus on F-actin and MT channel  
354 images, respectively. The ROI was quartered by four squares on the basis of the nucleus center  
355 and the four squares were rotated to get the axis of a quarter nucleus used as a standard 0 degree  
356 (Extended Data Fig. 2). All frequency histograms of the orientations of F-actin and MTs relative



357 to the axis were added from the four squares in the ROI and the frequency histogram was given as  
358 probability.

### 359 **Differential interference contrast (DIC) microscopy for endosperm area measurement**

360  
361 Siliques harvested at 1-5 DAP were opened on one side immediately after harvesting, transferred  
362 to fixing solution (ethanol (EtOH): acetic acid, 9:1) and stored overnight at 4°C. Siliques were  
363 carefully washed with 90% EtOH for 10 min followed by 70% EtOH for 10 min. They were then  
364 stored at 4°C in 70% EtOH until the next steps. The EtOH was removed, clearing solution (66.7%  
365 chloralhydrate, 25% H<sub>2</sub>O, and 8.3% glycerol) was added and incubated for 24 hours. After  
366 incubation, the valves and septum were removed and only the seeds were mounted on the slide  
367 with clearing solution. Cleared seeds were visualized by DIC using a Leica DM2500 LED  
368 microscope under 20X dry or 40X oil lenses. Endosperm area was determined manually by hand  
369 drawing in Fiji (ImageJ). Area values were obtained from Fiji (ImageJ) using the “Analyze  
370 particles” function. The means of 10-20 seeds from each sample were used for statistical analysis.

### 371 **Feulgen staining for determining endosperm cellularization**

372 Seeds were prepared using the Feulgen staining method described previously<sup>55</sup>. In brief, siliques  
373 harvested 5-6 DAP were opened on one side with needles and were incubated in a fixing solution  
374 (EtOH:acetic acid 3:1). After 24 hours of incubation, the fixing solution was then replaced with  
375 70% EtOH and the siliques were stored in 70% EtOH at 4°C until the next step. Stored samples  
376 were washed with water three times at 15 min intervals, incubated 1 h in 5N HCl followed by three  
377 washes with water at 15 min intervals. After that, samples were incubated in Schiff’s reagent for  
378 4 h and then washed three times in cold water at 15 min intervals. Samples were again washed  
379 with 70% EtOH and then 95% EtOH at 10 min intervals, and were then washed 4-5 times with

380 99.5% at 5 min intervals. Samples were incubated again for 1h in EtOH:LR white resin (1:1)  
381 followed by overnight incubation in LR white resin only. After incubation, seeds were mounted  
382 on glass slides and baked with LR white at 60°C for 8h. Seeds were observed under an FV3000  
383 laser scanning confocal system (Olympus) equipped with a 561-nm laser line with an excitation  
384 wavelength at 561 nm (Em 560-610). To get the cyst area, the cyst was marked manually by  
385 ImageJ on 6 DAP Feulgen staining endosperm images. Area values were obtained from Fiji  
386 (ImageJ) by the Analyze particles function.

### 387 **Seed size and weight measurements**

388 Six plants from each line were grown together under the same conditions, and mature seeds were  
389 collected to obtain seed size and weight data. Seed size was measured as described previously<sup>56</sup>.  
390 In brief, 1,500-3,000 seeds were spread on a Perspex box and scanned using an EPSON V800.  
391 Scanned images were used to determine seed area from Fiji (ImageJ) by the following sequence  
392 of actions: Image > Adjust > Color threshold > Analyze > Analyze particles. To avoid dust and  
393 aggregated seeds, only particles 0.02 – 0.2 mm<sup>2</sup> were measured. For each line, the seed size areas  
394 of 6,000 seeds, 1,000 from each plant, were analyzed using JMP pro16 software. To get the exact  
395 seed weight, ten sample batches each containing 100 seeds were counted and weighed manually.

### 396 **Statistics:**

397 All Tukey-Kramer HSD tests were performed using JMP pro16 software. All plots were  
398 prepared using GraphPad Prism 7 software.

399

### 400 **Acknowledgments**

401 We thank Drs. Anthony Clark and David Zaitlin for their critical comments on this manuscript and  
402 Dr. Yukinosuke Ohnishi for endosperm area analysis. This work was supported by NSF Grant

403 IOS-1928836 (to T.K.); National Institute of Food and Agriculture, US Department of Agriculture  
404 Hatch Program Grant 1014280 (to T.K.).

## 405 References

- 406 1. Sharma, V., Clark, A. J. & Kawashima, T. Insights into the molecular evolution of  
407 fertilization mechanism in land plants. *Plant Reprod.* **34**, 353–364 (2021).
- 408 2. Kawashima, T. & Berger, F. Green love talks; cell–cell communication during double  
409 fertilization in flowering plants. *AoB PLANTS* **2011**, plr015 (2011).
- 410 3. Berger, F. Endosperm development. *Curr. Opin. Plant Biol.* **2**, 28–32 (1999).
- 411 4. Brown, R. C., Lemmon, B. E., Nguyen, H. & Olsen, O.-A. Development of endosperm in  
412 *Arabidopsis thaliana*. *Sex. Plant Reprod.* **12**, 32–42 (1999).
- 413 5. Olsen, O.-A. Nuclear Endosperm Development in Cereals and *Arabidopsis thaliana*. *Plant*  
414 *Cell* **16**, S214–S227 (2004).
- 415 6. Olsen, O.-A., Linnestad, C. & Nichols, S. E. Developmental biology of the cereal  
416 endosperm. *Trends Plant Sci.* **4**, 253–257 (1999).
- 417 7. Brown, R. C., Lemmon, B. E. & Olsen, O.-A. Development of the endosperm in rice (*Oryza*  
418 *sativa* L.): Cellularization. *J. Plant Res.* **109**, 301–313 (1996).
- 419 8. Orozco-Arroyo, G., Paolo, D., Ezquer, I. & Colombo, L. Networks controlling seed size in  
420 *Arabidopsis*. *Plant Reprod.* **28**, 17–32 (2015).
- 421 9. Boissard-Lorig, C. *et al.* Dynamic Analyses of the Expression of the HISTONE::YFP Fusion  
422 Protein in *Arabidopsis* Show That Syncytial Endosperm Is Divided in Mitotic Domains.  
423 *Plant Cell* **13**, 495–509 (2001).
- 424 10. Kang, I.-H., Steffen, J. G., Portereiko, M. F., Lloyd, A. & Drews, G. N. The AGL62 MADS  
425 Domain Protein Regulates Cellularization during Endosperm Development in *Arabidopsis*.  
426 *Plant Cell* **20**, 635–647 (2008).
- 427 11. Ingouff, M., Haseloff, J. & Berger, F. Polycomb group genes control developmental timing  
428 of endosperm. *Plant J.* **42**, 663–674 (2005).
- 429 12. Ohad, N. *et al.* A mutation that allows endosperm development without fertilization. *Proc.*  
430 *Natl. Acad. Sci.* **93**, 5319–5324 (1996).
- 431 13. Scott, R. J., Spielman, M., Bailey, J. & Dickinson, H. G. Parent-of-origin effects on seed  
432 development in *Arabidopsis thaliana*. *Development* **125**, 3329–3341 (1998).
- 433 14. Lafon-Placette, C. *et al.* Endosperm-based hybridization barriers explain the pattern of gene  
434 flow between *Arabidopsis lyrata* and *Arabidopsis arenosa* in Central Europe. *Proc. Natl.*  
435 *Acad. Sci.* **114**, E1027–E1035 (2017).
- 436 15. Ohto, M., Floyd, S. K., Fischer, R. L., Goldberg, R. B. & Harada, J. J. Effects of  
437 APETALA2 on embryo, endosperm, and seed coat development determine seed size in  
438 *Arabidopsis*. *Sex. Plant Reprod.* **22**, 277–289 (2009).
- 439 16. Garcia, D. *et al.* *Arabidopsis* haiku Mutants Reveal New Controls of Seed Size by  
440 Endosperm. *Plant Physiol.* **131**, 1661–1670 (2003).
- 441 17. Zhang, B., Li, C., Li, Y. & Yu, H. Mobile TERMINAL FLOWER1 determines seed size in  
442 *Arabidopsis*. *Nat. Plants* **6**, 1146–1157 (2020).
- 443 18. Ali, M. F. *et al.* ARP2/3-independent WAVE/SCAR pathway and class XI myosin control  
444 sperm nuclear migration in flowering plants. *Proc. Natl. Acad. Sci.* **117**, 32757–32763  
445 (2020).

- 446 19. Kawashima, T. *et al.* Dynamic F-actin movement is essential for fertilization in *Arabidopsis*  
447 *thaliana*. *eLife* **3**, e04501 (2014).
- 448 20. Kimata, Y. *et al.* Cytoskeleton dynamics control the first asymmetric cell division in  
449 *Arabidopsis* zygote. *Proc. Natl. Acad. Sci.* **113**, 14157–14162 (2016).
- 450 21. Brown, R. C., Lemmon, B. E. & Nguyen, H. Events during the first four rounds of mitosis  
451 establish three developmental domains in the syncytial endosperm of *Arabidopsis thaliana*.  
452 *Protoplasma* **222**, 167–174 (2003).
- 453 22. Brown, R. C. & Lemmon, B. E. The cytoskeleton and spatial control of cytokinesis in the  
454 plant life cycle. *Protoplasma* **215**, 35–49 (2001).
- 455 23. Nguyen, H., Brown, R. C. & Lemmon, B. E. Patterns of Cytoskeletal Organization Reflect  
456 Distinct Developmental Domains in Endosperm of *Coronopus didymus* (Brassicaceae). *Int.*  
457 *J. Plant Sci.* **162**, 1–14 (2001).
- 458 24. Brown, R. C., Lemmon, B. E. & Olsen, O. A. Endosperm Development in Barley:  
459 Microtubule Involvement in the Morphogenetic Pathway. *Plant Cell* **6**, 1241–1252 (1994).
- 460 25. González-Gutiérrez, A. G., Gutiérrez-Mora, A., Verdín, J. & Rodríguez-Garay, B. An F-  
461 Actin Mega-Cable Is Associated With the Migration of the Sperm Nucleus During the  
462 Fertilization of the Polarity-Inverted Central Cell of *Agave inaequidens*. *Front. Plant Sci.* **12**,  
463 774098 (2021).
- 464 26. Ali, M. F. & Kawashima, T. Formins control dynamics of F-actin in the central cell of  
465 *Arabidopsis thaliana*. *Plant Signal. Behav.* **16**, 1920192 (2021).
- 466 27. Fatema, U., Ali, M. F., Hu, Z., Clark, A. J. & Kawashima, T. Gamete Nuclear Migration in  
467 Animals and Plants. *Front. Plant Sci.* **10**, (2019).
- 468 28. Shin, J. M., Yuan, L., Ohme-Takagi, M. & Kawashima, T. Cellular dynamics of double  
469 fertilization and early embryogenesis in flowering plants. *J. Exp. Zoolog. B Mol. Dev. Evol.*  
470 **336**, 642–651 (2021).
- 471 29. Faure, J.-E., Rotman, N., Fortuné, P. & Dumas, C. Fertilization in *Arabidopsis thaliana* wild  
472 type: Developmental stages and time course. *Plant J.* **30**, 481–488 (2002).
- 473 30. Maruyama, D., Higashiyama, T., Endo, T. & Nishikawa, S.-I. Fertilization-Coupled Sperm  
474 Nuclear Fusion Is Required for Normal Endosperm Nuclear Proliferation. *Plant Cell Physiol.*  
475 **61**, 29–40 (2020).
- 476 31. Belyy, A., Merino, F., Sitsel, O. & Raunser, S. Structure of the Lifeact–F-actin complex.  
477 *PLOS Biol.* **18**, e3000925 (2020).
- 478 32. Kumari, A., Kesarwani, S., Javoor, M. G., Vinothkumar, K. R. & Sirajuddin, M. Structural  
479 insights into actin filament recognition by commonly used cellular actin markers. *EMBO J.*  
480 **39**, (2020).
- 481 33. Picard, C. L., Povilus, R. A., Williams, B. P. & Gehring, M. Transcriptional and imprinting  
482 complexity in *Arabidopsis* seeds at single-nucleus resolution. *Nat. Plants* **7**, 730–738 (2021).
- 483 34. Belmonte, M. F. *et al.* Comprehensive developmental profiles of gene activity in regions and  
484 subregions of the *Arabidopsis* seed. *Proc. Natl. Acad. Sci.* **110**, E435–E444 (2013).
- 485 35. Kawashima, T. & Berger, F. The central cell nuclear position at the micropylar end is  
486 maintained by the balance of F-actin dynamics, but dispensable for karyogamy in  
487 *Arabidopsis*. *Plant Reprod.* **28**, 103–110 (2015).
- 488 36. Suarez, C. *et al.* Profilin regulates F-actin network homeostasis by favoring formin over  
489 Arp2/3 complex. *Dev. Cell* **32**, 43–53 (2015).
- 490 37. Kandasamy, M. K., McKinney, E. C. & Meagher, R. B. Functional nonequivalency of actin  
491 isovariants in *Arabidopsis*. *Mol. Biol. Cell* **13**, 251–261 (2002).

- 492 38. Canaday, J. *et al.* Microtubule assembly in higher plants. *Recent Res. Dev. Mol. Biol.* **2**, 103–  
493 119 (2004).
- 494 39. Masoud, K., Herzog, E., Chabouté, M.-E. & Schmit, A.-C. Microtubule nucleation and  
495 establishment of the mitotic spindle in vascular plant cells. *Plant J. Cell Mol. Biol.* **75**, 245–  
496 257 (2013).
- 497 40. Morejohn, L. C., Bureau, T. E., Molè-Bajer, J., Bajer, A. S. & Fosket, D. E. Oryzalin, a  
498 dinitroaniline herbicide, binds to plant tubulin and inhibits microtubule polymerization in  
499 vitro. *Planta* **172**, 252–264 (1987).
- 500 41. Lv, Z. *et al.* The Emergent Yo-yo Movement of Nuclei Driven by Cytoskeletal Remodeling  
501 in Pseudo-synchronous Mitotic Cycles. *Curr. Biol.* **30**, 2564-2573.e5 (2020).
- 502 42. Lv, Z., de-Carvalho, J., Telley, I. A. & Großhans, J. Cytoskeletal mechanics and dynamics in  
503 the *Drosophila* syncytial embryo. *J. Cell Sci.* **134**, jcs246496 (2021).
- 504 43. Sullivan, W. & Theurkauf, W. E. The cytoskeleton and morphogenesis of the early  
505 *Drosophila* embryo. *Curr. Opin. Cell Biol.* **7**, 18–22 (1995).
- 506 44. Karr, T. L. & Alberts, B. M. Organization of the cytoskeleton in early *Drosophila* embryos.  
507 *J. Cell Biol.* **102**, 1494–1509 (1986).
- 508 45. Sommi, P., Cheerambathur, D., Brust-Mascher, I. & Mogilner, A. Actomyosin-Dependent  
509 Cortical Dynamics Contributes to the Prophase Force-Balance in the Early *Drosophila*  
510 Embryo. *PLOS ONE* **6**, e18366 (2011).
- 511 46. Ingouff, M. *et al.* Plant formin AtFH5 is an evolutionarily conserved actin nucleator involved  
512 in cytokinesis. *Nat. Cell Biol.* **7**, 374–380 (2005).
- 513 47. Nguyen, H., Brown, R. C. & Lemmon, B. E. The specialized chalazal endosperm  
514 in *Arabidopsis thaliana* and *Lepidium virginicum* (Brassicaceae). *Protoplasma* **212**, 99–110  
515 (2000).
- 516 48. Baroux, C., Fransz, P. & Grossniklaus, U. Nuclear fusions contribute to polyploidization of  
517 the gigantic nuclei in the chalazal endosperm of *Arabidopsis*. *Planta* **220**, 38–46 (2004).
- 518 49. Fitz Gerald, J. N., Hui, P. S. & Berger, F. Polycomb group-dependent imprinting of the actin  
519 regulator AtFH5 regulates morphogenesis in *Arabidopsis thaliana*. *Dev. Camb. Engl.* **136**,  
520 3399–3404 (2009).
- 521 50. Qiu, J.-L., Jilk, R., Marks, M. D. & Szymanski, D. B. The *Arabidopsis* SPIKE1 Gene Is  
522 Required for Normal Cell Shape Control and Tissue Development. *Plant Cell* **14**, 101–118  
523 (2002).
- 524 51. Smith, L. G. Cytoskeletal control of plant cell shape: getting the fine points. *Curr. Opin.*  
525 *Plant Biol.* **6**, 63–73 (2003).
- 526 52. Beauzamy, L. *et al.* Endosperm turgor pressure decreases during early *Arabidopsis* seed  
527 development. *Development* **143**, 3295–3299 (2016).
- 528 53. Clough, S. J. & Bent, A. F. Floral dip: a simplified method for *Agrobacterium*-mediated  
529 transformation of *Arabidopsis thaliana*. *Plant J. Cell Mol. Biol.* **16**, 735–743 (1998).
- 530 54. Gooh, K. *et al.* Live-Cell Imaging and Optical Manipulation of *Arabidopsis* Early  
531 Embryogenesis. *Dev. Cell* **34**, 242–251 (2015).
- 532 55. Braselton, J. P., Wilkinson, M. J. & Clulow, S. A. Feulgen staining of intact plant tissues for  
533 confocal microscopy. *Biotech. Histochem. Off. Publ. Biol. Stain Comm.* **71**, 84–87 (1996).
- 534 56. Herridge, R. P., Day, R. C., Baldwin, S. & Macknight, R. C. Rapid analysis of seed size in  
535 *Arabidopsis* for mutant and QTL discovery. *Plant Methods* **7**, 3 (2011).
- 536



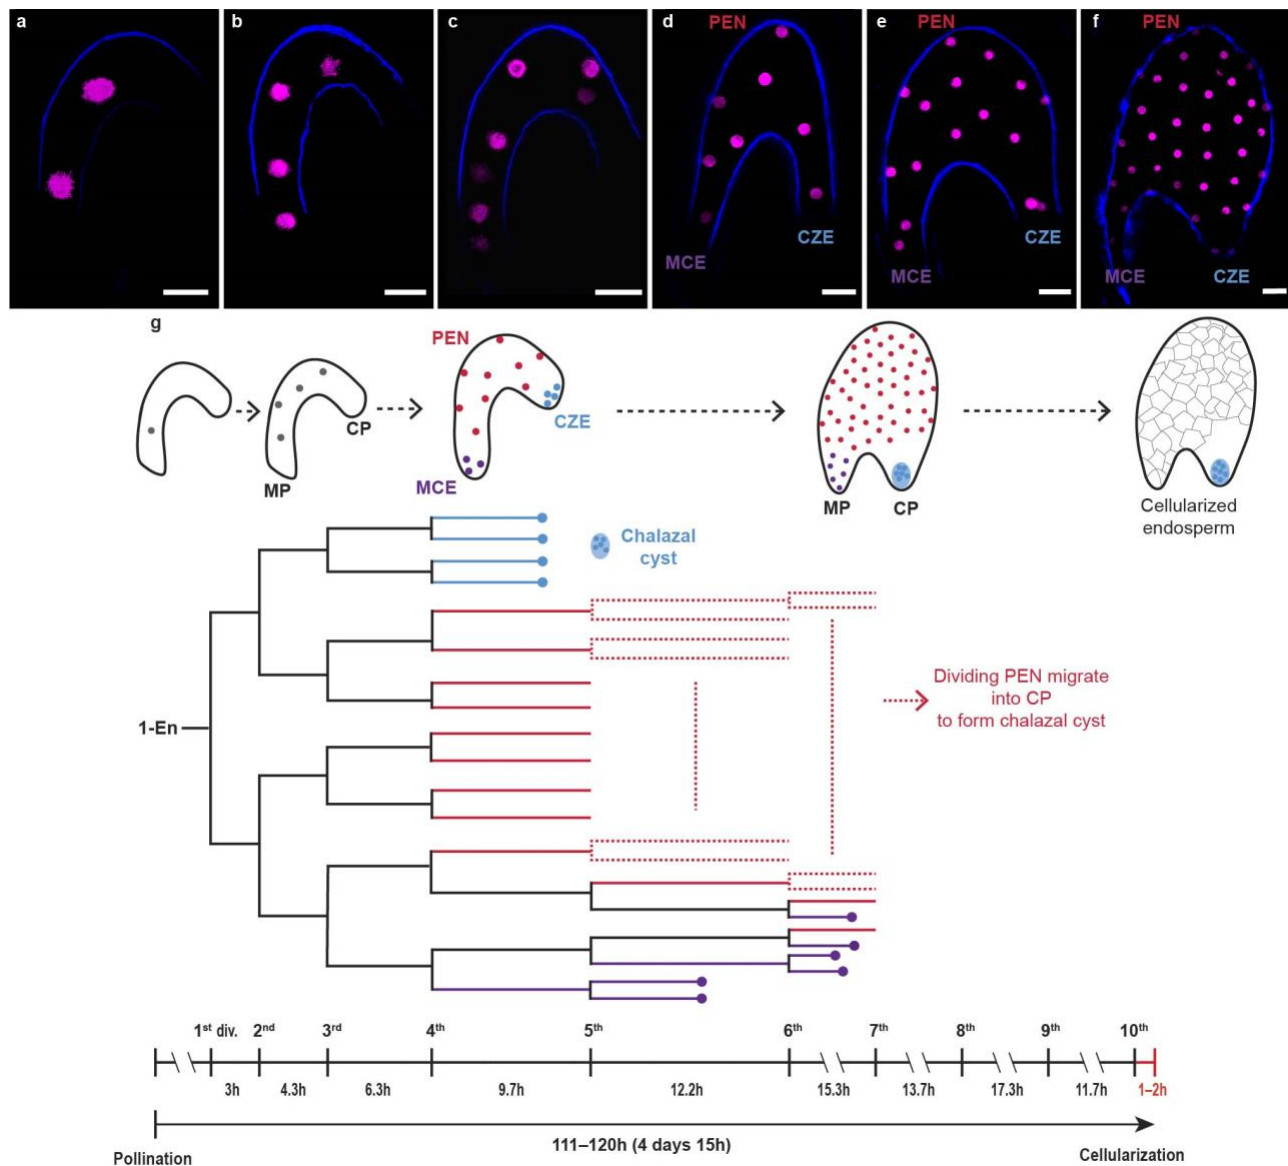

537

538 **Figure 1: Dynamics of coenocytic endosperm development.** a-f, Z-projected confocal images  
 539 of coenocytic endosperm nuclei (magenta, *proFWA::H2B:mRuby2*) after the 1<sup>st</sup> to 5<sup>th</sup> (a-e), and  
 540 7<sup>th</sup> or 8<sup>th</sup> divisions (f). Autofluorescence (blue) marks the coenocytic endosperm border. Scale bar,  
 541 20  $\mu$ m. g, Schematic representation of coenocytic endosperm development (top), the lineage of  
 542 endosperm nuclei fate from primary endosperm to endosperm cellularization (middle), and nuclear  
 543 division intervals (bottom). The dots in the lineage indicate nuclei which did not divide further.  
 544 The numbers of seeds observed for 1<sup>st</sup> division to 10<sup>th</sup> division intervals are shown in Extended  
 545 Data Figure 3. MP, micropylar pole; CP, chalazal pole; CZE, chalazal endosperm; MCE,  
 546 micropylar endosperm; PEN, peripheral endosperm. a-g correspond to Video 1.

547

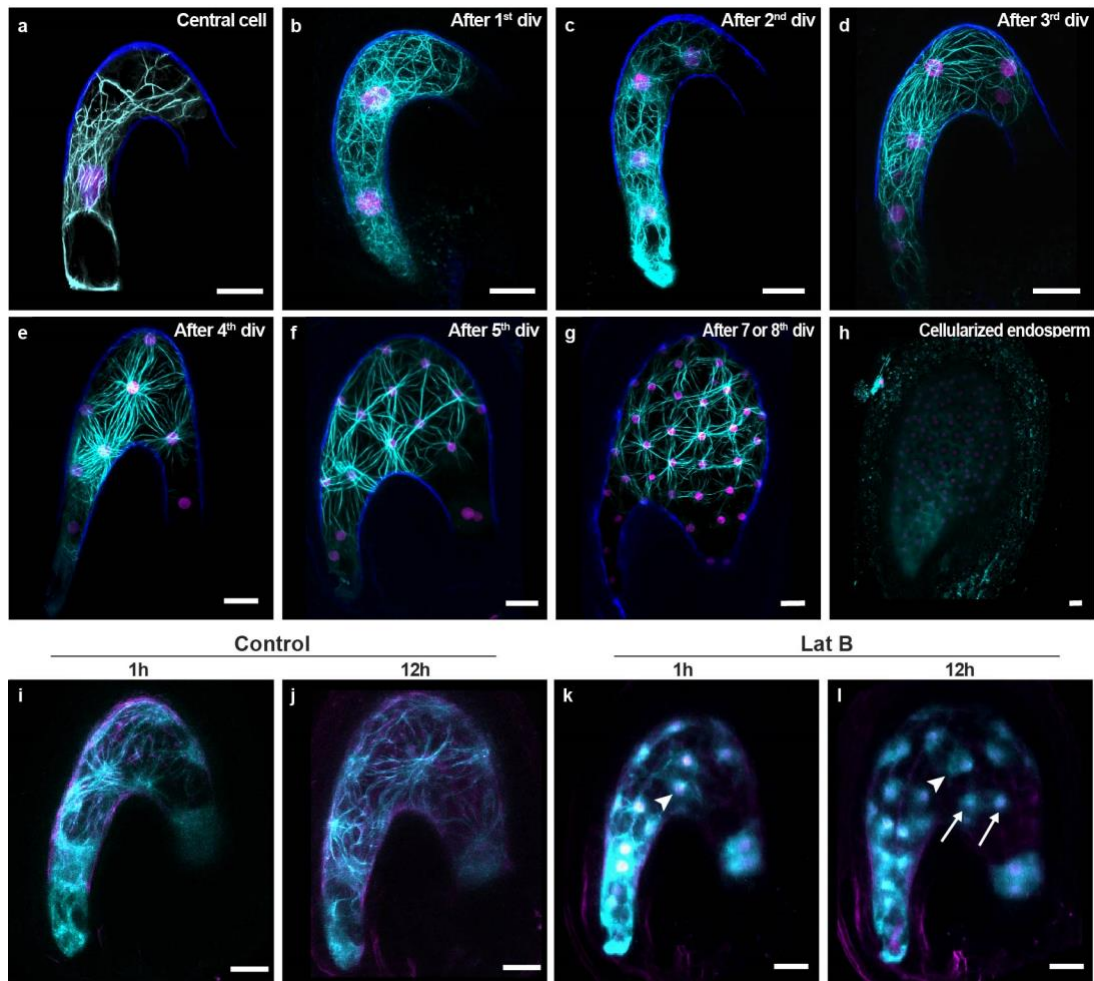

548

549

550 **Figure 2: Unique aster-shaped structures of F-actin during coenocytic endosperm**  
551 **development.** a-l, Z-projected confocal images of F-actin (cyan, *proFWA::Lifeact::Venus*),  
552 coenocytic endosperm nuclei (magenta, *proFWA::H2B::mRuby2*), and autofluorescence (blue)  
553 from the central cell (a), after the 1<sup>st</sup> to 5<sup>th</sup> divisions (b-f) and 7<sup>th</sup> or 8<sup>th</sup> division (g), and cellularized  
554 endosperm (h). Time-lapse Z-projected confocal images showing that Lat B treatment disrupted  
555 F-actin but did not inhibit nuclear divisions, control 1h and 12h after mock treatment (i, j) and Lat  
556 B 1h and 12h after treatment (k, l). Arrowheads indicate disrupted F-actin and the arrows indicate  
557 dividing nuclei. f corresponds to video 2, i-l correspond to video 4. Scale bar, 20 μm.

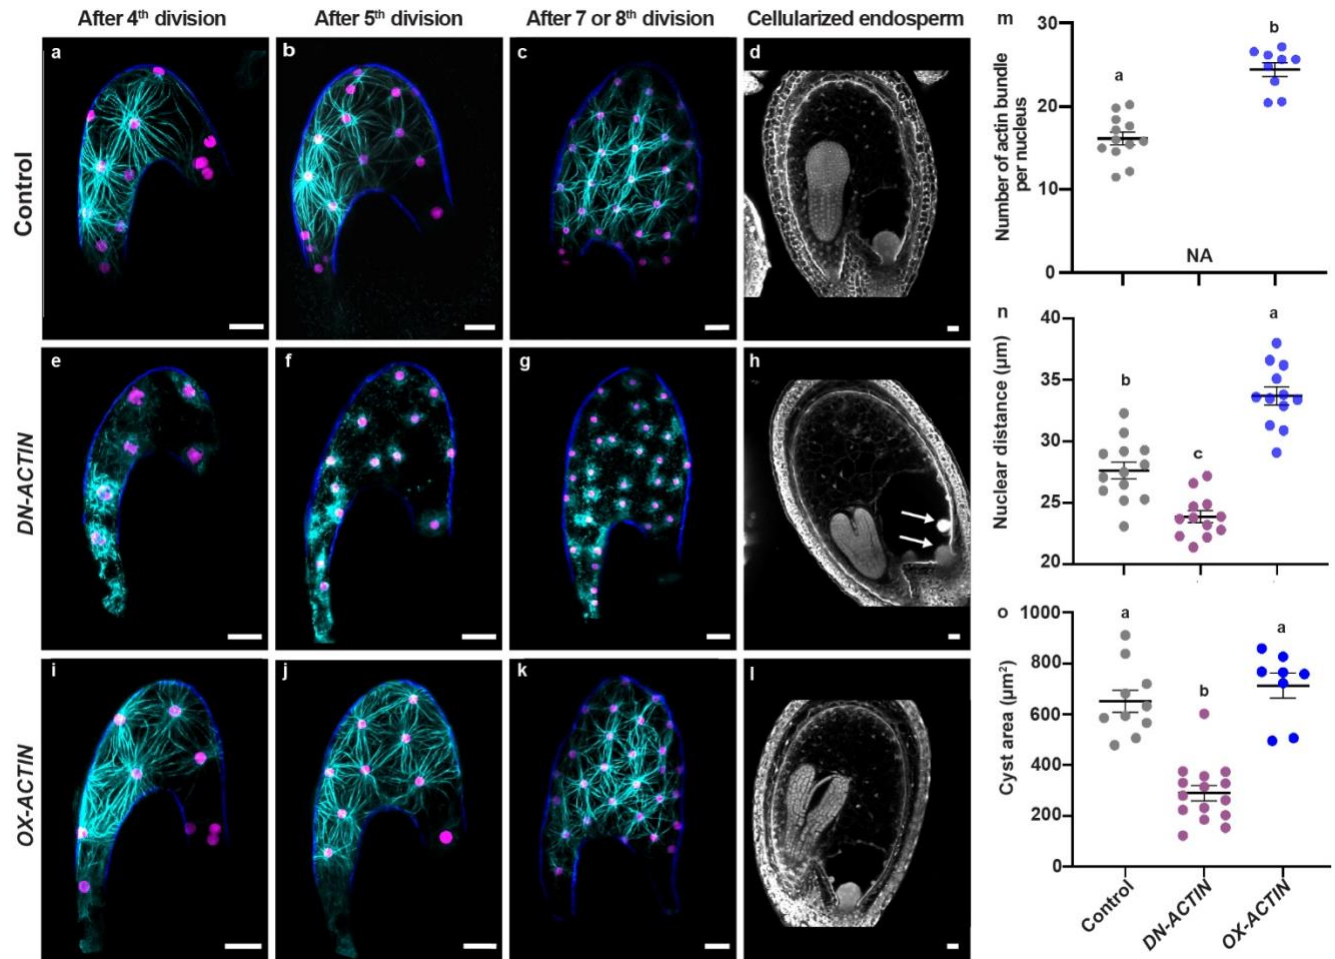

558

559

560 **Figure 3: F-actin controls nuclear organization during coenocytic endosperm development.**  
 561 **a-c, e-g, i-k,** Z-projected confocal images of F-actin (cyan, *proFWA::Lifeact::Venus*), coenocytic  
 562 endosperm nuclei (magenta, *proFWA::H2B::mRuby2*), and autofluorescence (blue) in the  
 563 coenocytic endosperm. Control (**a-c**), dominant negative actin (*DN-ACTIN*) (**e-g**), and  
 564 overexpressed actin (*OX-ACTIN*) (**i-k**). Scale bar, 20 μm. **d, h, l,** Z-projected confocal images of  
 565 Feulgen-stained cellularized endosperm at 6 days after pollination (DAP), control (**d**), *DN-ACTIN*  
 566 (**h**), *OX-ACTIN* (**l**). Arrows in **h** indicate multiple cysts. Scale bar, 20 μm. **m-n,** Quantitative  
 567 analysis of actin bundles around each nucleus (**m**) and internuclear distance (**n**) in coenocytic  
 568 endosperm after the 5<sup>th</sup> division. Individual dots represent the means of actin bundle number and  
 569 internuclear distance per seed, and black bars on the dot plots represent the mean of the means.  
 570 Error bars represent the standard errors. NA denotes not applicable, because no actin bundle. **o,**  
 571 Cyst size in the control, *DN-ACTIN*, and *OX-ACTIN*. Individual dots in the control and *OX-ACTIN*  
 572 represent the area of a single cyst from a single seed, and dots in *DN-ACTIN* represent the areas of  
 573 multiple cysts from a single seed (six seeds total). Levels not connected by the same letter (a–c on  
 574 the graph **m-o**) are significantly different ( $p < 0.01$ , Tukey-Kramer HSD test).



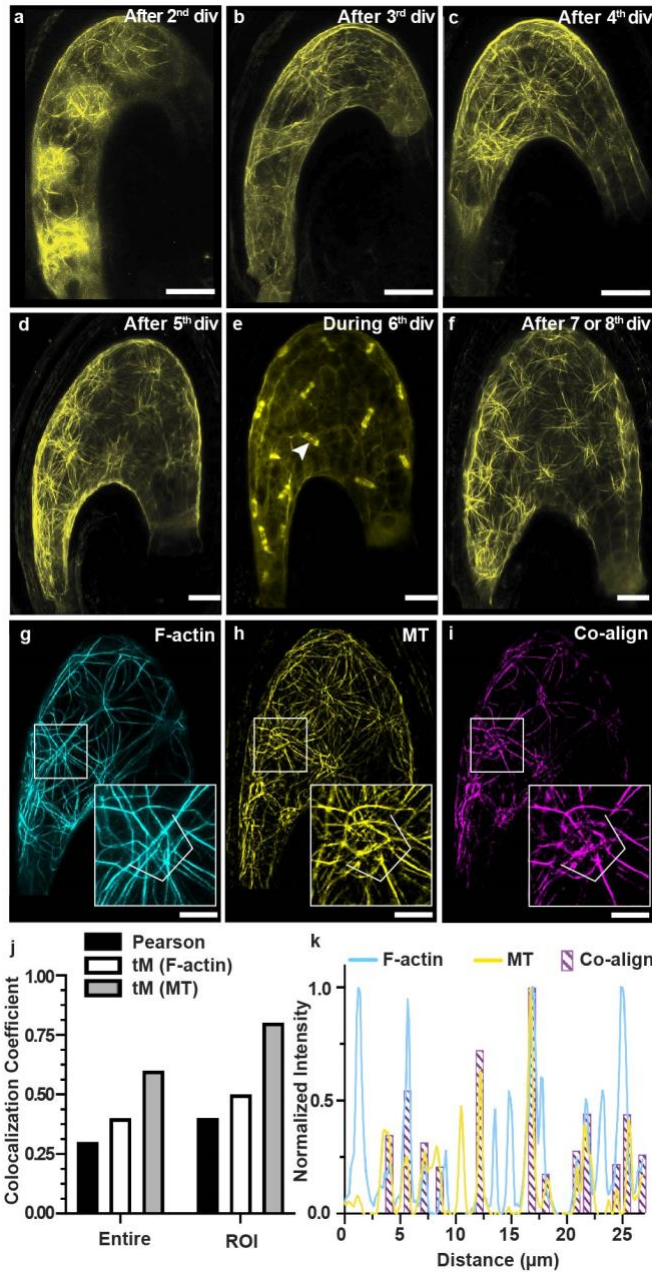

607

608 that F-actin, which does not show co-alignment with MTs at this position, co-aligns with MTs at  
 609 different positions (depth).

610

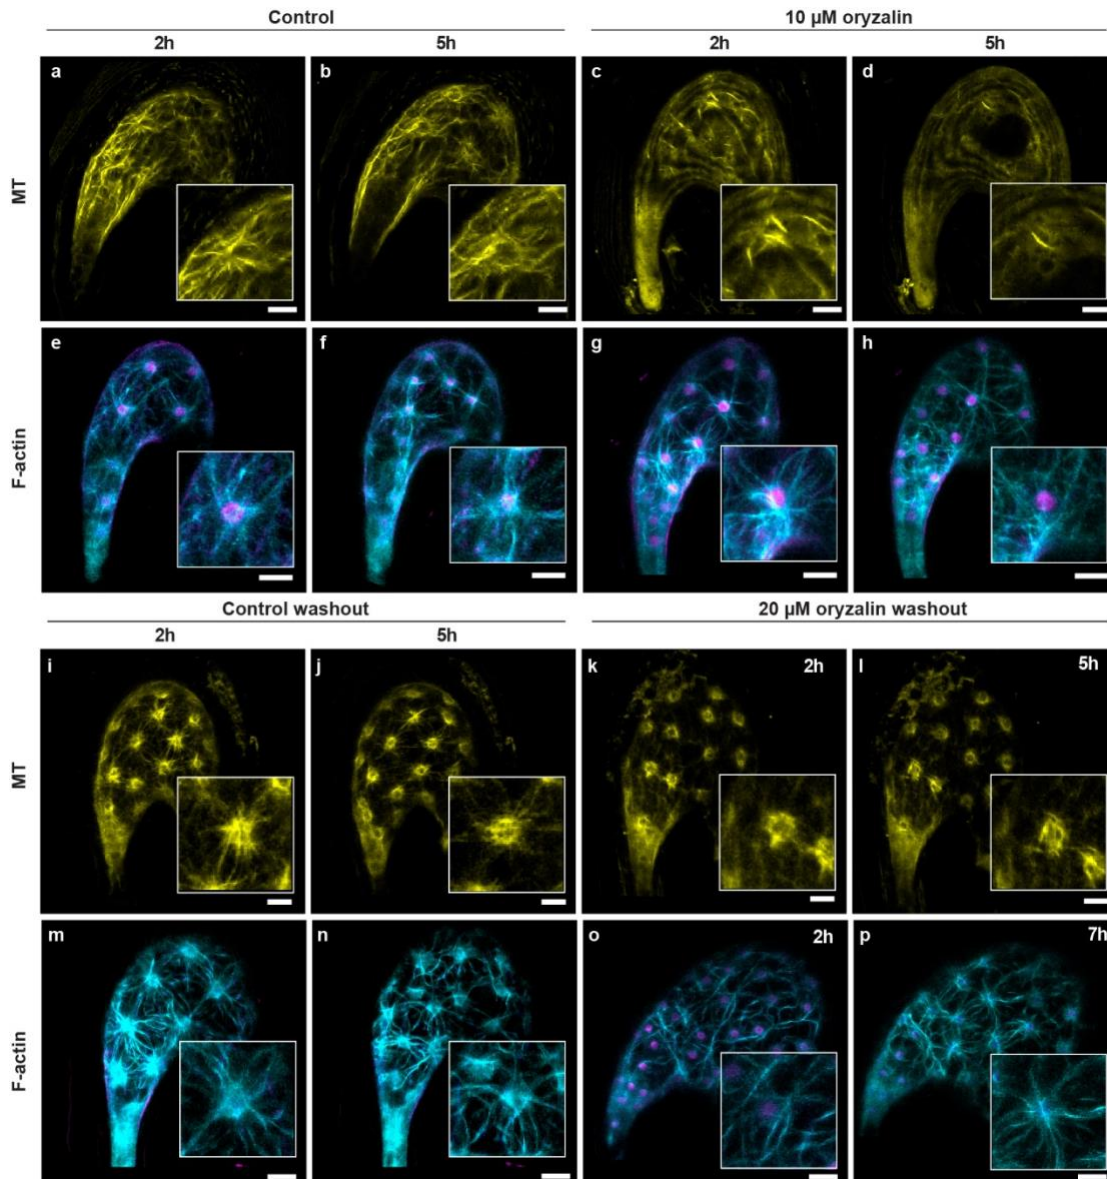

611

612 **Figure 5: MT asters are required for the organization of F-actin aster structures.** a-h, Time-  
613 lapse Z-projected confocal images of coenocytic endosperm MT (yellow, *proFWA::TagRFP::TUA5*) and F-actin (cyan, *proFWA::Lifeact::Venus*) with endosperm nuclei  
614 (magenta, *proFWA::H2B::mRuby2*) after mock and oryzalin treatments. MT control 2 h and 5 h  
615 after mock treatment (a, b), MT 2 h and 5 h after 10 μM oryzalin treatment (c, d), F-actin control  
616 2 h and 5 h after mock treatment (e, f), and F-actin 2 h and 5 h after 10 μM oryzalin treatment (g,  
617 h). a-d correspond to Video 8, and e-h correspond to Video 9. i-p, Time-lapse Z-projected confocal  
618 images of coenocytic endosperm MTs and F-actin after washout of 20 μM oryzalin. MTs 2 h and  
619 5 h control washout (i-j), MT 2 h and 5 h after oryzalin washout (k, l), F-actin 2 h and 5 h control  
620 washout (m, n), and F-actin 2 h and 7 h after oryzalin washout (o, p). Enlarged inserts at the bottom  
621 right of each image represent the F-actin and MTs around the nucleus. i-p correspond to Video 10.  
622 Scale bar, 20 μm.  
623

624

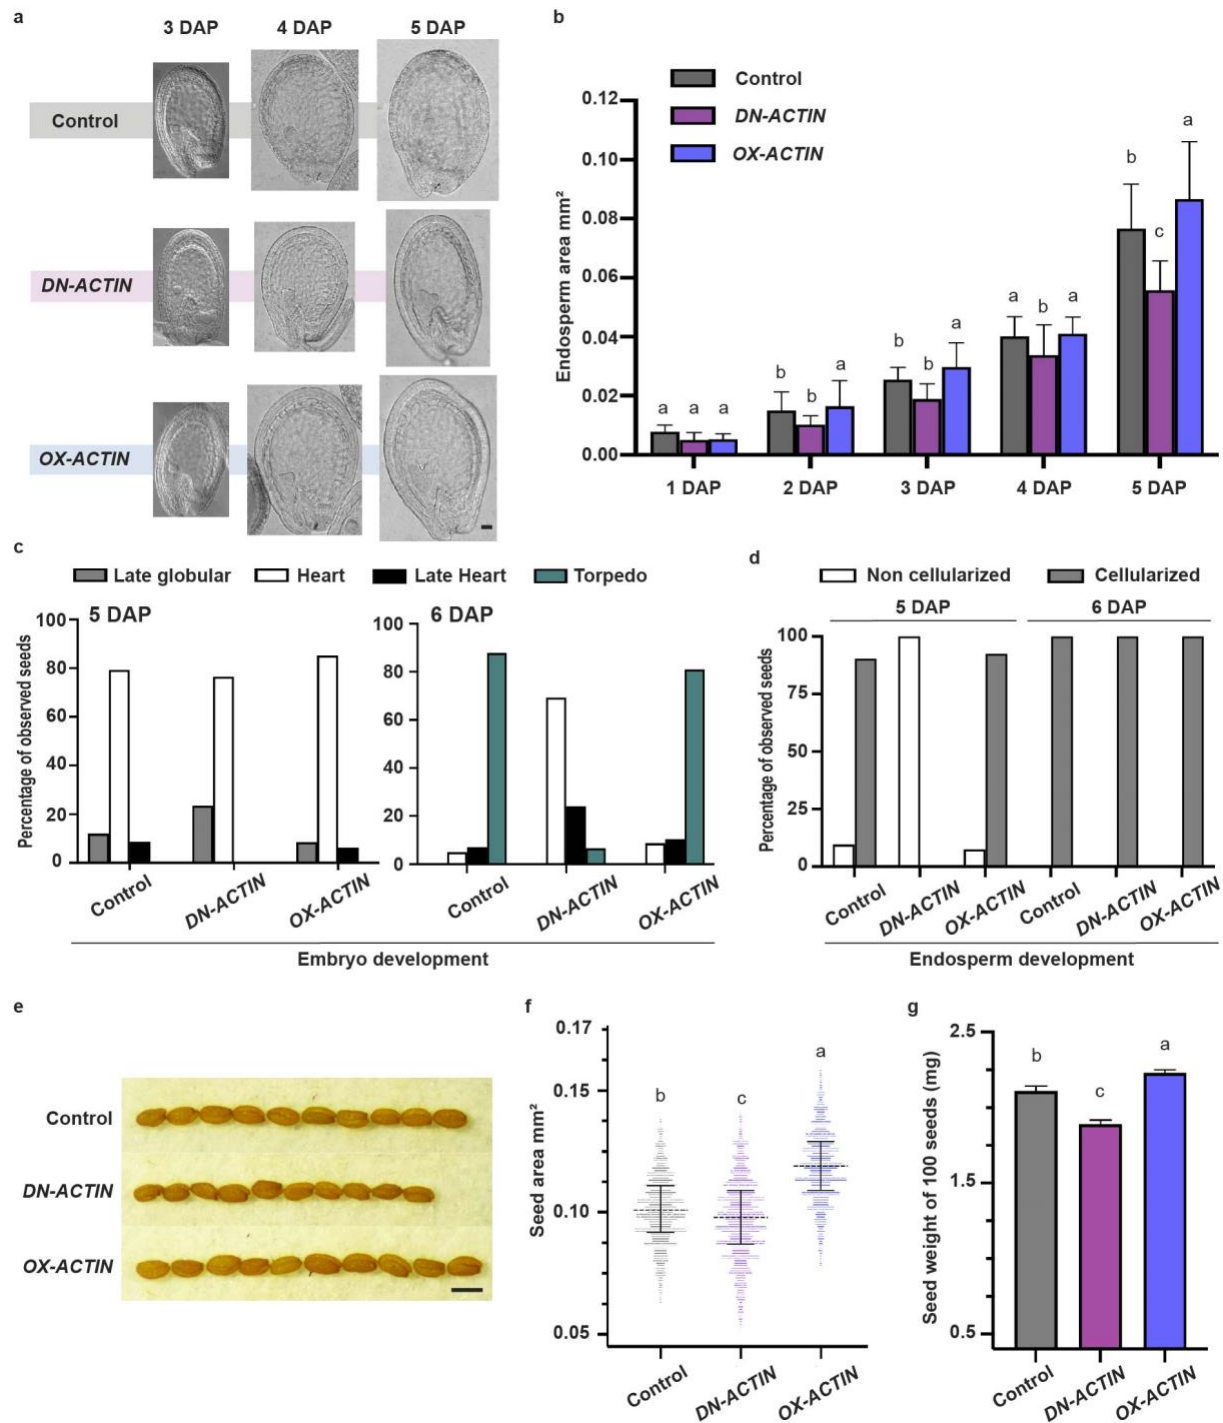

625

626 **Figure 6: F-actin dynamics in the coenocytic endosperm affect the endosperm and final seed**  
 627 **size. a**, DIC microscopy of cleared whole-mount control, *DN-ACTIN*, and *OX-ACTIN* seeds at 3,  
 628 4, and 5 DAP. Scale bar, 50  $\mu$ m. **b**, Average area of the coenocytic endosperm in control, *DN-*  
 629 *ACTIN*, and *OX-ACTIN* seeds from 1 to 5 DAP. 1-2 DAP, n=10 seeds; 3-5 DAP, n=15-20 seeds.  
 630 Error bars represent the standard error. Endosperm areas at the same stage were compared  
 631 statistically. **c-d**, The embryo (**c**) and endosperm (**d**) developmental stages observed in the control,

632 *DN-ACTIN*, and *OX-ACTIN* seeds at 5 and 6 DAP by Feulgen staining analysis. 5 DAP Control,  
633 n= 104; *DN-ACTIN*, n= 64; *OX-ACTIN*, n= 176; 6 DAP Control, n= 140; *DN-ACTIN*, n= 165; *OX-*  
634 *ACTIN*, n= 173. **e**, Comparison of mature seeds of the control, *DN-ACTIN* and *OX-ACTIN*. Scale  
635 bar, 500  $\mu\text{m}$ . **f-g**, Quantitative analysis of seed size (**f**) and 100-seed weight (**g**) of mature seeds in  
636 the control, *DN-ACTIN*, and *OX-ACTIN*. The seed size of each line is represented by 1,000 seeds  
637 per plant from six individual plants. The middle black dotted line within the plot shows the median.  
638 Seed weight is the average value of 10 sample batches each containing 100 seeds. Error bars  
639 represent the standard error. Levels not connected by the same letter (a–c on the graph **b, f, g**) are  
640 significantly different ( $p < 0.01$ , Tukey-Kramer HSD test).

641
